# Supplementary material for: Sodium salt medium-chain fatty acids and Bacillus-based probiotic strategies to improve growth and intestinal health of gilthead sea bream (Sparus aurata)
Source: PubMed Central journal article supplement (PMC5719961; doi:10.7717/peerj.4001), 2017-12-04
Supplement: peerj-05-4001-s002.pdf [file peerj-05-4001-s002.pdf]

## Growth Performance

| DIET | TANK | IBW | FBW   | SGR    | FE   | INTAKE G/FISH | WEIGHT GAIN |        |
|------|------|-----|-------|--------|------|---------------|-------------|--------|
| D1   | T21  |     | 28.41 |        |      | 0.835         | 155.40      |        |
| D1   | T32  |     | 29.83 | 148.15 | 1.60 | 0.808         | 146.35      | 396.64 |
| D1   | T24  |     | 29.23 | 147.17 | 1.62 | 0.818         | 144.20      | 403.50 |
| D2   | T31  |     | 29.75 | 170.25 | 1.74 | 0.828         | 169.75      | 472.27 |
| D2   | T23  |     | 29.3  | 163.18 | 1.72 | 0.843         | 158.88      | 456.94 |
| D2   | T34  |     | 29.39 | 169.64 | 1.75 | 0.869         | 161.45      | 477.21 |
| D3   | T22  |     | 29.73 | 143.43 | 1.57 | 0.830         | 139.80      | 382.44 |
| D3   | T35  |     | 28.88 | 149.40 | 1.64 | 0.844         | 142.74      | 417.33 |
| D3   | T36  |     | 31.85 | 144.65 | 1.51 | 0.832         | 137.16      | 354.17 |

**Biometric Indexes**

| DIET | FISH  | WEIGHT | LENGHT | Hc | Hb   | LIVER | Viscera | FAT  | INT. WEIGHT | INT. LENGHT | HSI  | VSI  | MSI  | II-I  | GI   | CF   |
|------|-------|--------|--------|----|------|-------|---------|------|-------------|-------------|------|------|------|-------|------|------|
| D1   | 21, 1 | 188    | 18.5   | 44 |      | 3.29  | 13.27   | 0.9  |             |             | 1.75 | 7.06 | 0.48 |       |      | 2.97 |
| D1   | 21, 2 | 172    | 18.5   | 40 | 10.7 | 2.13  | 12.5    | 2.96 |             |             | 1.24 | 7.27 | 1.72 |       |      | 2.72 |
| D1   | 21, 3 | 141    | 18.7   | 35 | 10.8 | 2.5   | 8.9     | 1.6  |             |             | 1.77 | 6.31 | 1.13 |       |      | 2.16 |
| D1   | 21, 4 | 163    | 18.3   |    | 10.9 | 2.65  | 11.42   | 3.09 | 4.95        | 10.5        | 1.63 | 7.01 | 1.90 | 14.08 |      | 2.66 |
| D1   | 21, 5 | 173    | 17.5   |    | 7.6  | 2.63  | 11.34   | 1.29 | 3.41        | 13.7        | 1.52 | 6.55 | 0.75 | 6.73  | 0.13 | 3.23 |
| D1   | 21, 6 | 149    | 18.2   | 44 | 9.5  | 3     | 9.1     | 0.8  | 2.1         | 13          | 2.01 | 6.11 | 0.54 | 6.78  | 0.10 | 2.47 |
| D1   | 24, 1 | 170    | 18     | 40 | 10.4 | 2.91  | 8.73    | 1.09 |             |             | 1.71 | 5.14 | 0.64 |       |      | 2.91 |
| D1   | 24, 2 | 161    | 18.1   | 40 | 9.3  | 3.83  | 10.32   | 1.15 |             |             | 2.38 | 6.41 | 0.71 |       |      | 2.72 |
| D1   | 24, 3 | 191    | 17.9   | 40 | 10.4 | 3.2   | 12      | 1.8  |             |             | 1.68 | 6.28 | 0.94 |       |      | 3.33 |
| D1   | 24, 4 | 146    | 17.3   | 46 | 10.5 | 2.52  | 9.49    | 3.12 | 2.43        | 9           | 1.73 | 6.50 | 2.14 | 20.03 | 0.33 | 2.82 |
| D1   | 24, 5 | 158    | 17.8   | 40 | 9.4  | 2.88  | 12.83   | 3.25 | 1.99        | 12.1        | 1.82 | 8.12 | 2.06 | 8.92  | 0.11 | 2.80 |
| D1   | 24, 6 | 143.5  | 16.8   | 39 | 9.9  | 2.6   | 9.4     | 1.5  | 1.6         |             | 1.81 | 6.55 | 1.05 |       |      | 3.03 |
| D1   | 32, 1 | 157    | 17     | 42 | 10.2 | 2.38  | 9.71    | 1.75 |             |             | 1.52 | 6.18 | 1.11 |       |      | 3.20 |
| D1   | 32, 2 | 172    | 18.5   | 55 | 11.8 | 3.4   | 10.29   | 0.61 |             |             | 1.98 | 5.98 | 0.35 |       |      | 2.72 |
| D1   | 32, 3 | 143    | 16.57  | 54 | 11.8 | 2.7   | 10      | 1.7  |             |             | 1.89 | 6.99 | 1.19 |       |      | 3.14 |
| D1   | 32, 4 | 137    | 17.4   | 42 | 10.9 | 2.1   | 9.91    | 3.01 | 2.9         | 11          | 1.53 | 7.23 | 2.20 | 10.29 | 0.22 | 2.60 |
| D1   | 32, 5 | 173    | 18.3   | 47 | 10.6 | 2.72  | 12.49   | 2.6  | 1.96        | 12.2        | 1.57 | 7.22 | 1.50 | 9.53  | 0.11 | 2.82 |
| D1   | 32, 6 | 118    | 16.1   | 48 | 9.8  | 2     | 7.5     | 1.1  | 2.5         | 6.7         | 1.69 | 6.36 | 0.93 |       |      | 2.83 |

|    |       |       |      |    |      |      |       |      |      |      |      |      |      |       |      |      |
|----|-------|-------|------|----|------|------|-------|------|------|------|------|------|------|-------|------|------|
| D2 | 23, 1 | 176.5 | 18   | 35 | 12.3 | 3.04 | 9.85  | 1.49 |      |      | 1.72 | 5.58 | 0.84 |       |      | 3.03 |
| D2 | 23, 2 | 220.5 | 20.3 | 34 | 10.8 | 3.38 | 13.39 | 2.32 |      |      | 1.53 | 6.07 | 1.05 |       |      | 2.64 |
| D2 | 23, 3 | 188   | 18.5 | 45 | 6.4  | 4.2  | 14.4  | 2.7  |      |      | 2.23 | 7.66 | 1.44 |       |      | 2.97 |
| D2 | 23, 4 | 175   | 17.5 | 51 | 11.9 | 4.18 | 12.23 | 3.21 | 2.41 | 10   | 2.39 | 6.99 | 1.83 | 17.50 | 0.24 | 3.27 |
| D2 | 23, 5 | 174   | 18.5 | 49 | 11.5 | 3.76 | 10.73 | 1.48 | 2.63 | 10.3 | 2.16 | 6.17 | 0.85 | 15.92 | 0.24 | 2.75 |
| D2 | 23, 6 | 139   | 16.7 | 45 | 11.6 | 3.1  | 10.7  | 2.9  | 2.3  | 8.5  | 2.23 | 7.70 | 2.09 | 22.63 | 0.37 | 2.98 |
| D2 | 31, 1 | 142   | 16.5 | 40 | 9.8  | 2.61 | 8.23  | 2.19 |      |      | 1.84 | 5.80 | 1.54 |       |      | 3.16 |
| D2 | 31, 2 | 148   | 17   | 40 | 9.9  | 3.05 | 13.69 | 3.65 |      |      | 2.06 | 9.25 | 2.47 |       |      | 3.01 |
| D2 | 31, 3 | 169   | 17.8 | 34 | 8.8  | 3.2  | 9.2   | 0.7  |      |      | 1.89 | 5.44 | 0.41 |       |      | 3.00 |
| D2 | 31, 4 | 167   | 18   | 37 | 10.3 | 4.38 | 12.3  | 1.89 | 3.46 | 10.6 | 2.62 | 7.37 | 1.13 | 14.02 | 0.29 | 2.86 |
| D2 | 31, 5 | 189   | 18.1 | 30 | 8.7  | 4.47 | 15.12 | 3.81 | 3.19 | 12.6 | 2.37 | 8.00 | 2.02 | 9.45  | 0.16 | 3.19 |
| D2 | 31, 6 | 193.5 | 16.8 | 35 | 10.6 | 4.4  | 13.8  | 1.2  | 1.8  | 9.6  | 2.27 | 7.13 | 0.62 | 21.87 | 0.20 | 4.08 |
| D2 | 34, 1 | 183   | 18.5 | 32 | 8.9  | 3.5  | 14.7  | 4.06 |      |      | 1.91 | 8.03 | 2.22 |       |      | 2.89 |
| D2 | 34, 2 | 159   | 18.3 | 37 | 9.9  | 3.14 | 11.47 | 2.19 |      |      | 1.97 | 7.21 | 1.38 |       |      | 2.59 |
| D2 | 34, 3 | 162   | 17.3 | 45 | 10.6 | 3.3  | 12.1  | 1.9  |      |      | 2.04 | 7.47 | 1.17 |       |      | 3.13 |
| D2 | 34, 4 | 184   | 19.3 | 34 | 9.4  | 3.1  | 12.35 | 3.73 | 2.95 | 11.3 | 1.68 | 6.71 | 2.03 | 12.75 | 0.21 | 2.56 |
| D2 | 34, 5 | 152   | 17.8 | 43 | 11.1 | 3    | 10.15 | 1.55 | 1.78 | 8.5  | 1.97 | 6.68 | 1.02 | 24.75 | 0.29 | 2.70 |
| D2 | 34, 6 | 193.5 | 18.6 | 46 | 12.2 | 3.4  | 10.2  | 0.6  | 2.9  | 8.6  | 1.76 | 5.27 | 0.31 | 30.42 | 0.46 | 3.01 |

|    |       |       |      |    |      |      |       |      |      |      |      |      |      |       |      |      |
|----|-------|-------|------|----|------|------|-------|------|------|------|------|------|------|-------|------|------|
| D3 | 22, 1 | 161.5 | 17.5 | 41 | 9.9  | 2.29 | 8.22  | 1.13 |      |      | 1.42 | 5.09 | 0.70 |       |      | 3.01 |
| D3 | 22, 2 | 186.5 | 19   | 34 | 9.1  | 3.87 | 8.9   | 1.93 |      |      | 2.08 | 4.77 | 1.03 |       |      | 2.72 |
| D3 | 22, 4 | 150   | 17.5 |    | 9.3  | 2.84 | 11.43 | 2.94 | 3.28 | 15.1 | 1.89 | 7.62 | 1.96 | 4.03  | 0.09 | 2.80 |
| D3 | 22, 5 | 129.5 | 17.3 | 46 | 10.7 | 2.41 | 7.65  | 1.03 | 2.92 | 10.1 | 1.86 | 5.91 | 0.80 | 12.57 | 0.28 | 2.50 |

|    |      |     |      |    |      |      |       |      |      |      |      |      |      |       |      |      |
|----|------|-----|------|----|------|------|-------|------|------|------|------|------|------|-------|------|------|
| D3 | 22,6 | 169 | 18.6 |    | 8.1  | 2.9  | 9.3   | 0.9  | 2.2  | 9.2  | 1.72 | 5.50 | 0.53 | 21.70 | 0.28 | 2.63 |
| D3 | 35,1 | 126 | 15   | 42 | 10.3 | 2.37 | 8.9   | 1.39 |      |      | 1.88 | 7.06 | 1.10 |       |      | 3.73 |
| D3 | 35,2 | 160 | 17.7 | 39 | 9.2  | 3.57 | 10.86 | 1.25 |      |      | 2.23 | 6.79 | 0.78 |       |      | 2.89 |
| D3 | 35,3 | 161 | 17.3 | 56 | 11.1 | 3.6  | 10.9  | 1.3  |      |      | 2.24 | 6.77 | 0.81 |       |      | 3.11 |
| D3 | 35,4 | 163 | 18.7 | 36 | 8.7  | 3.19 | 11.43 | 2.4  | 2.87 | 8.5  | 1.96 | 7.01 | 1.47 | 26.54 | 0.47 | 2.49 |
| D3 | 35,5 | 140 | 17.1 | 40 | 8.7  | 2.45 | 12.51 | 3.73 | 1.74 | 12.2 | 1.75 | 8.94 |      | 7.71  | 0.10 | 2.80 |
| D3 | 35,6 | 150 | 17.1 | 46 | 11.1 | 3.3  | 11    | 2.2  | 1.9  | 13.2 | 2.20 | 7.33 | 1.47 | 6.52  | 0.08 | 3.00 |
| D3 | 36,1 | 123 | 16.4 | 33 | 10   | 1.77 | 7.77  | 1.37 |      |      | 1.44 | 6.32 | 1.11 |       |      | 2.79 |
| D3 | 36,2 | 141 | 17.3 | 35 | 10.9 | 2.27 | 10.19 | 1.67 |      |      | 1.61 | 7.23 | 1.18 |       |      | 2.72 |
| D3 | 36,3 | 147 | 16.9 | 30 | 8    | 2.3  | 11.1  | 2.9  |      |      | 1.56 | 7.55 | 1.97 |       |      | 3.05 |
| D3 | 36,4 | 170 | 17.7 | 32 | 9.9  | 2.25 | 10.63 | 2.55 | 2.97 | 13.5 | 1.32 | 6.25 | 1.50 | 6.91  | 0.12 | 3.07 |
| D3 | 36,5 | 133 | 17.2 | 38 | 10.4 | 1.93 | 10.22 | 2.51 | 1.37 | 8.8  | 1.45 | 7.68 | 1.89 | 19.52 | 0.20 | 2.61 |
| D3 | 36,6 | 153 | 17.3 | 30 | 7.9  | 2.4  | 11.4  | 6.4  | 1.6  | 14.2 | 1.57 | 7.45 |      | 5.34  | 0.06 | 2.95 |

Biochemistry

|      | DIET | FISH | Glucose (mg/dl) | Protein (ug/ml) | Protein g/l | Cholest. tot (ug/poc.) | Cholesterol (mg/dl) | TG (ug/well) | Triglicerides (mM) | Raw data antioxidant | Antioxidant act(trolox) mM | ortisol ng/ml | IGF-I ng/ml | GH (ng/ml) | ative complement | IgM     | Lysozyme |
|------|------|------|-----------------|-----------------|-------------|------------------------|---------------------|--------------|--------------------|----------------------|----------------------------|---------------|-------------|------------|------------------|---------|----------|
| D1   | 21.1 |      |                 | 15.77           | 39.425      | 7.15                   | 178.75              | 54.22        | 12.15              | 0.082                | 0.82                       | 3.71          |             | 10.192     | 36.76            | 1.4226  | 0        |
|      | 21.2 |      | 40.54           | 18.47           | 46.175      | 8.27                   | 206.75              | 17.97        | 4.03               | 0.086                | 0.86                       | 6.75          | 88.368      | 18.384     | 22.27            | 1.29835 | 450      |
|      | 21.3 |      | 39.07           | 16.09           | 40.225      | 6.53                   | 163.25              | 37.49        | 8.40               | 0.093                | 0.93                       | 7.42          | 72.576      | 8.552      | 17.12            | 1.5451  | 133.33   |
|      | 24.1 |      | 29.5            | 15.91           | 39.775      | 10.42                  | 260.5               | 60.56        | 13.57              | 0.098                | 0.98                       |               |             | 17.728     | 6.25             | 1.04065 | 70       |
|      | 24.2 |      | 39.8            | 15.01           | 37.525      | 6.67                   | 166.75              | 12.77        | 2.86               | 0.085                | 0.85                       | 10.31         | 90.048      | 10.904     | 38.99            | 1.29405 | 92.2     |
|      | 24.3 |      | 33.8            | 14.81           | 37.025      | 7.58                   | 189.5               | 22.64        | 5.07               | 0.09                 | 0.90                       |               | 77.112      | 8.752      | 45.25            | 1.33045 | 28.89    |
|      | 32.1 |      | 35.9            | 14.85           | 37.125      | 7.68                   | 192                 | 14.68        | 3.29               | 0.092                | 0.92                       | 8.56          | 90.048      | 9.804      | 46.40            | 1.04935 | 0        |
|      | 32.2 |      | 35.8            | 17.94           | 44.85       | 6.69                   | 167.25              | 37.71        | 8.45               | 0.096                | 0.96                       | 10.40         | 84.336      | 7.66       | 7.73             | 1.3846  | 12.2     |
|      | 32.3 |      | 40.6            | 17.12           | 42.8        | 6.87                   | 171.75              | 21.06        | 4.72               | 0.091                | 0.91                       | 10.79         |             | 10.448     | 12.16            | 1.08945 | 56.65    |
|      | D2   | 23.1 |                 | 47.2            | 17.78       | 44.45                  | 6.71                | 167.75       | 11.09              | 2.48                 | 0.1                        | 1.00          |             |            | 8.692            | 31.25   | 0.76415  |
| 23.2 |      |      | 47.9            | 15.08           | 37.7        | 8.39                   | 209.75              | 7.94         | 1.78               | 0.098                | 0.98                       | 7.70          |             |            | 29.54            | 1.09155 | 0        |
| 23.3 |      |      | 47.8            | 17.93           | 44.825      | 8.71                   | 217.75              | 11.71        | 2.62               | 0.095                | 0.95                       | 6.06          | 82.656      |            | 78.43            | 0.9018  | 75.5555  |
| 31.1 |      |      | 37.2            | 13.58           | 33.95       | 7.52                   | 188                 | 44.43        | 9.95               | 0.7                  |                            |               | 83.664      | 12.768     | 44.44            | 1.55445 | 0        |
| 31.2 |      |      | 55.8            | 15.92           | 39.8        | 8.33                   | 208.25              | 34.58        | 7.75               | 0.088                | 0.88                       | 4.64          | 115.92      | 8.784      | 2.13             | 1.0648  | 56.6666  |
| 31.3 |      |      | 38.9            | 16.9            | 42.25       | 7.25                   | 181.25              | 15.31        | 3.43               | 0.081                | 0.81                       | 5.56          | 110.88      | 11.928     | 1.87             | 1.48245 | 36.67    |
| 34.1 |      |      | 34.7            | 15.18           | 37.95       | 6.67                   | 166.75              | 10.34        | 2.32               | 0.078                | 0.78                       | 6.55          | 71.4        | 8.544      | 0.38             | 1.06185 | 0        |
| 34.2 |      |      | 43.3            | 17.4            | 43.5        | 8.27                   | 206.75              | 19.57        | 4.38               | 0.086                | 0.86                       | 9.94          | 116.76      | 10.536     | 0.14             | 0.89175 | 0        |
| 34.3 |      |      | 40.1            | 15.4            | 38.5        | 7.11                   | 177.75              | 34.91        | 7.82               | 0.079                | 0.79                       | 7.98          | 80.136      | 15.02      | 32.68            | 1.2447  | 93.333   |
| D3   |      | 22.1 |                 | 36.4            | 16.63       | 41.575                 | 7.26                | 181.5        | 12.42              | 2.78                 | 0.087                      | 0.87          | 10.5        | 27.048     | 17.908           | 26.56   | 1.04765  |
|      | 22.2 |      | 41.1            | 15.12           | 37.8        | 7.24                   | 181                 | 17.63        | 3.95               | 0.082                | 0.82                       | 6.19          | 103.992     | 19.188     | 23.95            | 0.5399  | 0        |
|      | 22.3 |      | 44.6            | 18.19           | 45.475      | 7.72                   | 193                 | 10.37        | 2.32               | 0.092                | 0.92                       |               | 87.024      | 12.16      | 55.71            | 1.18375 | 18.89    |
|      | 35.1 |      | 43.5            | 15.49           | 38.725      | 7.11                   | 177.75              | 35.63        | 7.98               | 0.085                | 0.85                       | 4.32          | 102.984     | 11.552     | 19.82            | 1.47465 | 15.5556  |
|      | 35.2 |      | 35.1            | 14.68           | 36.7        | 6.1                    | 152.5               | 15.15        | 3.39               | 0.082                | 0.82                       | 0.91          | 97.44       | 7.828      | 28.86            | 0.8134  | 1.111    |
|      | 35.3 |      | 48.5            | 15.25           | 38.125      | 7.27                   | 181.75              | 45.7         |                    | 0.088                | 0.88                       | 1.9           | 93.912      | 12.216     | 17.56            | 1.8599  | 0        |
|      | 36.1 |      | 37.1            | 16.02           | 40.05       | 6.93                   | 173.25              | 15.59        | 3.49               | 0.11                 |                            | 5.2           | 77.28       | 15         | 47.51            | 0.81545 | 67.66    |
|      | 36.2 |      | 43.6            | 12.15           | 30.375      | 5.4                    | 135                 | 9.98         | 2.24               | 0.089                |                            | 4.97          | 83.328      | 9.86       | 39.14            | 0.76085 | 17.7777  |
|      | 36.3 |      | 52.7            | 16.72           | 41.8        | 6.15                   | 153.75              | 7.33         | 1.64               | 0.12                 |                            | 3.92          | 72.072      | 18.776     | 2.94             | 0.86155 | 0        |

## Gene Expression - AI D1

|               | 21.1       | 24.1       | 32.1       | 21.2       | 24.2       | 32.2       | 21.3       | 21.3       | 32.3       |
|---------------|------------|------------|------------|------------|------------|------------|------------|------------|------------|
|               | Expression | Expression | Expression | Expression | Expression | Expression | Expression | Expression | Expression |
| OCLN          | 5.776      | 7.362      | 8.754      | 3.272      | 7.413      |            | 5.776      | 6.148      |            |
| CLDN12        | 0.707      | 0.953      | 1.206      | 0.543      | 1.087      |            | 0.790      | 1.266      |            |
| CLDN15        | 26.723     | 19.698     | 38.055     | 19.293     | 27.096     |            | 17.630     | 42.814     |            |
| CDH1          | 17.630     | 17.268     | 26.538     |            | 16.912     |            | 25.107     | 33.591     |            |
| CDH17         | 56.103     | 79.341     | 77.708     | 51.984     | 83.865     |            | 49.522     | 105.420    |            |
| ALPI          |            | 97.681     | 92.411     | 83.865     | 138.141    |            | 133.436    | 130.690    |            |
| FABP1         | 108.383    | 147.033    | 176.069    | 95.670     | 207.937    |            | 192.672    | 188.706    |            |
| FABP2         | 168.897    |            | 266.871    | 170.072    | 608.874    |            | 265.028    | 704.277    |            |
| FABP6         | 0.014      | 0.022      | 0.008      | 0.007      |            |            | 0.013      | 0.076      |            |
| MUC2          | 38.586     | 36.758     | 53.076     | 30.484     | 41.933     |            | 36.504     | 53.446     |            |
| MUC13         | 120.259    | 116.970    | 167.730    | 92.411     | 135.298    |            | 196.720    | 215.269    |            |
| I-MUC         | 0.198      | 0.112      | 0.131      | 0.187      | 0.150      |            | 0.121      | 0.054      |            |
| HES1-B        | 3.340      | 5.278      | 2.158      | 2.071      | 2.770      |            | 4.170      | 6.916      |            |
| KLF4          | 1.972      | 3.811      | 3.031      | 2.000      | 2.969      |            | 3.074      | 3.294      |            |
| TNF- $\alpha$ | 0.144      | 0.188      | 0.107      | 0.039      | 0.157      |            | 0.123      | 0.171      |            |
| IL-1 $\beta$  | 0.051      | 0.108      | 0.083      | 0.050      | 0.090      |            | 0.092      | 0.071      |            |
| IL-6          | 0.016      | 0.025      | 0.031      | 0.011      | 0.013      |            | 0.063      | 0.026      |            |
| IL-8          | 0.140      | 0.323      |            | 0.122      | 0.283      |            | 0.275      | 0.330      |            |
| IL-10         | 0.062      | 0.093      | 0.164      | 0.087      | 0.105      |            | 0.143      |            |            |
| CD4-full      | 0.403      | 0.441      | 0.590      | 0.272      | 0.325      |            | 0.480      | 1.214      |            |
| CD8a          | 0.473      | 0.847      | 0.933      | 0.514      | 0.871      |            | 0.801      | 1.181      |            |
| CD8b          | 0.063      | 0.132      | 0.177      | 0.060      | 0.116      |            | 0.100      | 0.156      |            |
| LGALS1        | 4.347      | 5.736      | 6.821      | 2.585      | 7.781      |            | 5.169      | 7.413      |            |
| LGALS8        | 3.630      | 2.603      | 4.563      | 2.462      | 4.500      |            | 3.317      | 5.278      |            |
| IgM           | 2.313      | 1.580      | 16.912     | 7.568      | 13.737     |            | 1.919      | 26.723     |            |
| IgT           | 0.041      | 0.064      | 0.135      | 0.085      | 0.069      |            | 0.066      | 0.243      |            |
| IgT-m         | 0.366      | 0.435      | 0.532      | 0.376      | 0.460      |            | 0.521      |            |            |
| mIgM          | 0.098      | 0.076      | 0.262      | 0.109      | 0.206      |            | 0.097      | 0.570      |            |
| SIRT1         | 0.629      | 1.028      | 1.223      |            | 0.933      | 1.214      | 0.993      | 1.376      | 0.807      |
| SIRT2         | 0.824      | 1.050      | 1.357      |            | 1.580      | 1.385      | 1.102      | 1.569      | 0.871      |
| SIRT3         |            | 0.420      | 0.697      |            | 0.337      | 0.674      | 0.366      | 0.774      | 0.374      |
| SIRT4         | 0.111      | 0.136      | 0.233      |            | 0.139      | 0.133      | 0.154      | 0.228      | 0.070      |
| SIRT5         | 0.790      | 1.007      | 1.310      |            | 1.223      | 0.993      | 0.959      | 1.636      | 0.737      |
| SIRT6         | 0.147      | 0.259      | 0.349      |            | 0.235      | 0.248      | 0.261      | 0.316      | 0.125      |
| SIRT7         | 0.183      | 0.222      | 0.285      |            | 0.277      | 0.323      | 0.232      | 0.354      | 0.193      |

## Gene Expression - AI D2

|               | 31.1       | 23.1       | 34.1       | 31.2       | 23.2       | 34.2       | 31.3       | 31.3       | 34.3       |
|---------------|------------|------------|------------|------------|------------|------------|------------|------------|------------|
|               | Expression | Expression | Expression | Expression | Expression | Expression | Expression | Expression | Expression |
| OCLN          | 5.098      | 6.021      | 6.821      | 4.993      | 5.618      | 6.498      | 6.635      | 6.635      | 5.897      |
| CLDN12        | 1.223      | 1.157      | 0.829      | 1.007      | 1.125      | 0.829      | 1.028      | 1.231      | 1.042      |
| CLDN15        | 25.813     | 20.535     | 26.173     | 23.264     | 20.112     | 25.107     | 21.706     | 23.588     | 25.281     |
| CDH1          | 17.509     | 13.642     | 12.996     | 17.509     | 12.210     | 14.825     | 14.123     | 15.137     | 12.042     |
| CDH17         | 53.817     | 70.522     | 65.345     | 59.714     | 62.250     | 60.969     | 64.893     | 69.071     | 58.081     |
| ALPI          | 137.187    | 135.298    | 95.010     | 162.017    | 102.537    | 123.640    |            | 103.968    | 135.298    |
| FABP1         | 142.025    | 121.938    | 136.239    | 142.025    | 154.343    | 151.167    | 210.839    | 168.897    | 171.255    |
| FABP2         | 265.028    | 1,045.516  | 487.751    | 474.413    | 948.826    | 714.109    | 1,278.290  | 666.287    | 729.114    |
| FABP6         | 0.016      | 0.023      | 0.011      | 0.027      | 0.050      | 0.010      | 0.020      |            | 0.021      |
| MUC2          | 46.851     | 55.330     | 56.886     | 38.055     | 37.792     | 53.817     | 32.900     | 41.070     | 36.504     |
| MUC13         | 128.890    | 113.772    | 102.537    | 150.123    | 98.360     | 121.938    | 102.537    | 121.095    | 128.890    |
| I-MUC         | 0.132      | 0.200      | 0.088      | 0.097      | 0.026      | 0.117      | 0.076      | 0.395      | 0.215      |
| HES1-B        | 5.098      | 2.395      | 3.864      | 4.691      | 2.828      | 2.532      | 2.204      | 2.329      | 3.706      |
| KLF4          | 3.580      | 3.117      | 3.053      | 2.585      | 1.828      | 2.657      | 2.346      | 2.532      | 2.428      |
| TNF- $\alpha$ | 0.128      | 0.093      | 0.094      | 0.176      | 0.103      | 0.070      | 0.133      | 0.075      | 0.129      |
| IL-1 $\beta$  | 0.094      | 0.065      | 0.072      | 0.084      | 0.060      | 0.071      | 0.103      | 0.077      | 0.101      |
| IL-6          | 0.014      | 0.021      |            | 0.018      | 0.014      | 0.020      | 0.023      | 0.020      | 0.024      |
| IL-8          | 0.146      | 0.123      | 0.147      | 0.171      | 0.072      | 0.129      | 0.105      | 0.114      | 0.184      |
| IL-10         | 0.137      | 0.093      | 0.095      | 0.126      | 0.099      | 0.116      | 0.132      | 0.141      | 0.128      |
| CD4-full      | 0.387      | 0.332      | 0.277      | 0.354      | 0.387      | 0.319      | 0.304      | 0.454      | 0.314      |
| CD8a          | 1.366      | 0.883      | 0.518      | 0.871      | 1.102      | 0.547      | 0.979      | 0.693      | 0.763      |
| CD8b          | 0.224      | 0.128      | 0.053      | 0.104      | 0.248      | 0.071      | 0.110      | 0.082      | 0.107      |
| LGALS1        | 4.993      | 6.453      | 5.278      | 4.377      | 6.681      | 4.959      | 6.277      | 6.409      | 7.890      |
| LGALS8        | 3.138      | 2.621      | 2.549      | 3.294      | 2.585      | 3.204      | 1.919      | 2.445      | 3.095      |
| IgM           | 7.160      | 2.639      | 5.352      | 1.223      | 1.932      | 7.160      | 1.165      | 7.111      | 3.531      |
| IgT           | 0.075      | 0.117      | 0.071      | 0.069      | 0.080      | 0.128      | 0.107      | 0.031      | 0.049      |
| IgT-m         | 0.196      | 0.563      | 0.460      | 0.476      | 0.346      | 0.525      | 0.603      | 0.259      | 0.543      |
| mIgM          | 0.186      | 0.125      | 0.118      | 0.120      | 0.111      | 0.148      | 0.060      | 0.207      | 0.240      |
| SIRT1         | 1.057      | 0.717      | 0.841      | 0.871      | 0.633      | 0.908      | 0.883      | 0.859      | 0.753      |
| SIRT2         | 1.149      | 1.231      | 1.050      | 1.057      | 0.993      | 1.021      | 0.940      | 0.966      | 1.064      |
| SIRT3         | 0.314      | 0.293      | 0.406      | 0.289      | 0.349      | 0.363      | 0.328      | 0.354      | 0.429      |
| SIRT4         | 0.210      | 0.129      | 0.130      | 0.137      | 0.110      | 0.122      | 0.098      | 0.105      | 0.136      |
| SIRT5         | 1.283      | 0.946      | 1.117      | 0.847      | 1.079      | 0.835      | 1.173      | 0.993      | 1.050      |
| SIRT6         | 0.250      | 0.212      | 0.210      | 0.192      | 0.166      | 0.209      | 0.219      | 0.213      | 0.171      |
| SIRT7         | 0.295      | 0.250      | 0.245      | 0.232      | 0.200      | 0.253      | 0.237      | 0.206      | 0.255      |

## Gene Expression - AI D3

|               | 22.1       | 35.1       | 36.1       | 22.2       | 35.2       | 36.2       | 22.3       | 22.3       | 36.3       |
|---------------|------------|------------|------------|------------|------------|------------|------------|------------|------------|
|               | Expression | Expression | Expression | Expression | Expression | Expression | Expression | Expression | Expression |
| OCLN          | 4.377      | 6.320      | 7.781      | 5.696      | 6.105      | 7.674      | 5.315      | 6.635      | 10.629     |
| CLDN12        | 0.683      | 1.014      | 1.042      | 1.050      | 1.007      | 1.087      | 0.841      | 0.959      | 0.824      |
| CLDN15        | 17.148     | 22.943     | 34.535     | 25.107     | 24.420     | 32.223     | 22.471     | 25.634     | 33.825     |
| CDH1          | 11.959     | 15.032     | 18.896     | 15.889     | 17.388     | 12.729     | 12.641     | 15.242     | 14.026     |
| CDH17         | 52.346     | 79.893     | 79.341     | 59.302     | 87.427     | 71.012     | 58.081     | 82.139     | 77.708     |
| ALPI          | 71.506     | 89.884     | 135.298    | 105.420    | 97.006     | 123.640    | 59.302     | 116.970    | 80.449     |
| FABP1         | 118.603    | 122.786    | 145.009    | 166.572    | 155.417    | 174.853    | 148.056    | 151.167    |            |
| FABP2         | 477.713    | 552.565    | 270.597    | 326.288    | 792.353    | 471.136    | 749.612    | 809.002    |            |
| FABP6         | 0.034      | 0.112      | 0.021      | 0.038      | 0.038      | 0.021      | 0.114      | 0.124      | 0.056      |
| MUC2          | 28.246     | 35.753     | 42.224     | 42.814     | 34.060     | 36.758     | 43.411     | 54.948     | 33.359     |
| MUC13         | 78.793     | 120.259    | 94.353     | 125.366    | 111.430    | 107.635    | 88.647     | 138.141    | 106.891    |
| I-MUC         | 0.136      | 0.037      | 0.268      | 0.113      | 0.055      | 0.196      | 0.088      | 0.076      | 0.155      |
| HES1-B        | 3.204      | 1.693      | 4.500      | 5.352      | 3.891      | 4.287      | 3.364      | 4.000      | 2.028      |
| KLF4          | 1.828      | 3.031      | 3.294      | 3.972      | 1.972      | 3.387      | 3.387      | 4.438      | 3.010      |
| TNF- $\alpha$ | 0.113      | 0.093      | 0.146      | 0.110      | 0.143      | 0.159      | 0.118      | 0.112      | 0.109      |
| IL-1 $\beta$  | 0.060      | 0.050      | 0.110      | 0.143      | 0.070      | 0.090      | 0.076      | 0.098      | 0.080      |
| IL-6          | 0.024      | 0.018      | 0.038      | 0.053      | 0.020      | 0.038      | 0.036      |            | 0.033      |
| IL-8          | 0.119      | 0.125      | 0.382      | 0.154      | 0.182      | 0.180      | 0.135      | 0.139      | 0.124      |
| IL-10         | 0.076      | 0.101      | 0.113      | 0.110      | 0.071      | 0.164      | 0.066      | 0.105      | 0.145      |
| CD4-full      | 0.275      | 0.423      | 0.259      | 0.401      | 0.295      | 0.325      | 0.310      | 0.291      | 0.325      |
| CD8a          | 0.678      | 0.637      | 0.889      | 0.812      | 0.435      | 0.732      | 0.521      | 0.859      | 0.865      |
| CD8b          | 0.104      | 0.087      | 0.097      | 0.099      | 0.057      | 0.129      | 0.064      | 0.104      | 0.116      |
| LGALS1        | 2.868      | 6.320      | 4.925      | 7.621      | 3.945      | 4.823      | 7.111      | 4.993      | 5.205      |
| LGALS8        | 1.548      | 2.751      | 2.657      | 2.514      | 3.182      | 2.848      | 1.879      | 3.891      | 3.249      |
| IgM           | 7.362      | 6.277      | 5.098      | 3.160      | 4.170      | 7.781      |            | 8.056      | 4.257      |
| IgT           | 0.117      | 0.092      | 0.177      | 0.195      | 0.139      | 0.056      | 0.085      | 0.090      | 0.129      |
| IgT-m         | 0.183      | 0.261      | 0.697      | 0.927      | 0.507      | 1.028      | 0.212      | 0.403      | 0.973      |
| mIgM          | 0.098      | 0.117      | 0.128      | 0.178      | 0.063      | 0.198      | 0.096      | 0.150      | 0.154      |
| SIRT1         | 0.559      | 0.747      | 0.865      | 0.801      | 0.707      |            | 0.702      | 0.812      | 0.927      |
| SIRT2         | 0.678      | 0.959      | 0.914      | 0.933      | 0.933      | 1.223      | 0.707      | 1.165      | 0.824      |
| SIRT3         | 0.206      | 0.356      | 0.384      | 0.395      | 0.301      | 0.454      | 0.262      | 0.384      | 0.328      |
| SIRT4         | 0.087      | 0.139      | 0.128      | 0.130      | 0.157      | 0.133      | 0.083      | 0.154      | 0.079      |
| SIRT5         | 0.435      | 1.007      | 1.283      | 0.946      | 0.835      | 1.414      | 0.722      | 0.933      | 1.064      |
| SIRT6         |            | 0.224      | 0.210      | 0.192      | 0.210      | 0.210      | 0.140      | 0.180      | 0.202      |
| SIRT7         | 0.132      | 0.204      | 0.207      | 0.177      | 0.177      |            | 0.131      | 0.213      | 0.225      |

## Gene Expression - PI D1

|               | 21.1       | 24.1       | 32.1       | 21.2       | 24.2       | 32.2       | 21.3       | 21.3       | 32.3       |
|---------------|------------|------------|------------|------------|------------|------------|------------|------------|------------|
|               | Expression | Expression | Expression | Expression | Expression | Expression | Expression | Expression | Expression |
| OCLN          | 7.727      | 9.849      | 9.126      | 7.674      | 10.853     |            | 7.413      |            | 7.013      |
| CLDN12        | 0.790      | 1.376      | 0.933      | 0.853      | 1.548      |            | 0.796      |            | 0.829      |
| CLDN15        | 32.223     | 38.854     | 41.070     | 42.518     | 58.081     |            | 41.643     |            | 26.355     |
| CDH1          | 10.056     | 13.833     | 11.314     | 8.754      | 15.242     |            | 16.795     |            | 9.514      |
| CDH17         | 47.505     | 49.522     | 48.168     | 40.224     | 41.070     |            | 40.504     |            | 54.569     |
| ALPI          | 42.814     | 30.274     | 22.162     | 15.889     | 18.896     |            | 35.261     |            | 36.252     |
| FABP1         | 138.141    | 92.411     | 97.006     | 99.044     | 51.268     |            | 176.069    |            | 184.823    |
| FABP2         | 657.114    | 439.586    | 504.951    | 487.751    |            |            | 556.408    |            | 995.999    |
| FABP6         | 5,293.477  | 4,672.568  | 2,856.435  | 2,916.455  | 2,778.326  |            | 4,096.000  |            | 1,351.176  |
| MUC2          | 33.825     | 39.671     | 50.914     | 25.813     | 39.397     |            | 45.255     |            | 30.910     |
| MUC13         | 95.010     | 100.427    | 106.153    | 79.893     | 104.691    |            | 151.167    |            | 74.028     |
| I-MUC         | 9.190      | 0.310      | 24.251     | 11.551     | 12.553     |            | 0.146      | 0.297      | 0.032      |
| HES1-B        | 3.434      | 6.105      | 2.713      | 3.458      | 4.959      |            | 4.469      |            | 3.160      |
| KLF4          | 1.866      | 2.250      | 1.972      | 1.828      | 3.138      |            | 1.959      |            | 2.462      |
| TNF- $\alpha$ | 0.091      | 0.158      | 0.136      | 0.093      | 0.097      |            | 0.139      |            | 0.110      |
| IL-1 $\beta$  | 0.099      | 0.159      | 0.079      | 0.113      | 0.130      |            | 0.127      |            | 0.081      |
| IL-6          | 0.016      | 0.020      | 0.028      | 0.018      | 0.017      |            | 0.033      |            |            |
| IL-8          | 0.115      | 0.270      | 0.707      | 0.603      | 0.188      |            | 0.202      |            | 0.147      |
| IL-10         | 0.110      | 0.207      | 0.164      | 0.172      | 0.134      |            | 0.156      |            | 0.156      |
| CD4-full      | 0.460      | 0.785      | 0.559      | 0.467      | 0.551      |            | 0.551      |            | 0.500      |
| CD8a          | 0.616      | 1.366      | 0.895      | 0.543      |            |            | 0.824      |            | 0.551      |
| CD8b          | 0.080      | 0.212      | 0.150      | 0.142      | 0.178      |            | 0.107      |            | 0.095      |
| LGALS1        | 8.456      | 13.086     | 8.340      | 10.126     | 14.520     |            | 8.056      |            | 8.938      |
| LGALS8        | 2.329      | 3.681      | 2.532      | 3.053      | 4.595      |            | 2.266      |            | 2.514      |
| IgM           | 2.378      | 27.096     | 17.509     | 4.959      | 22.471     |            | 2.949      |            | 5.938      |
| IgT           | 0.019      | 0.038      | 0.136      | 0.093      | 0.032      |            | 0.040      |            | 0.022      |
| IgT-m         | 0.521      | 0.847      | 0.688      | 0.511      | 0.369      |            | 0.473      |            | 0.688      |
| mIgM          | 0.293      | 0.812      | 0.611      | 0.158      | 0.454      |            | 0.275      |            | 0.164      |
| SIRT1         | 0.660      | 1.021      | 0.678      | 0.683      | 1.102      |            | 0.683      | 1.329      | 0.646      |
| SIRT2         | 0.853      | 1.240      | 1.087      | 0.959      |            | 1.516      | 0.883      | 1.474      | 0.737      |
| SIRT3         | 0.206      | 0.486      | 0.363      | 0.299      | 0.460      | 0.841      | 0.262      | 0.847      | 0.354      |
| SIRT4         | 0.066      | 0.115      | 0.098      | 0.099      | 0.130      | 0.233      | 0.097      | 0.235      | 0.075      |
| SIRT5         | 0.763      | 1.320      | 0.895      | 0.914      | 1.275      | 1.636      | 0.790      | 1.591      | 0.796      |
| SIRT6         | 0.102      | 0.289      | 0.152      | 0.189      | 0.241      | 0.334      | 0.204      |            | 0.141      |
| SIRT7         | 0.171      | 0.328      | 0.178      | 0.289      | 0.312      | 0.261      | 0.224      | 0.308      | 0.193      |



## Gene Expression - PI D2

|               | 31.1       | 23.1       | 34.1       | 31.2       | 23.2       | 34.2       | 31.3       | 31.3       | 34.3       |
|---------------|------------|------------|------------|------------|------------|------------|------------|------------|------------|
|               | Expression | Expression | Expression | Expression | Expression | Expression | Expression | Expression | Expression |
| OCLN          | 10.483     | 10.339     | 9.000      | 15.348     | 10.703     | 12.210     | 6.727      | 9.190      | 8.056      |
| CLDN12        | 1.310      | 1.257      | 0.908      | 1.828      | 1.647      | 1.717      | 0.859      | 1.275      | 0.835      |
| CLDN15        | 49.180     | 45.255     | 33.825     | 75.061     | 67.649     | 77.708     | 19.293     | 29.651     | 40.504     |
| CDH1          | 18.379     | 13.361     | 9.063      | 21.259     | 18.507     | 22.627     | 10.339     | 12.641     | 12.553     |
| CDH17         | 41.070     | 62.683     | 75.061     | 40.504     | 49.867     | 38.055     | 48.840     | 69.551     | 51.625     |
| ALPI          | 38.319     | 48.168     | 28.443     | 21.556     | 29.857     | 42.814     | 40.786     | 88.647     | 29.041     |
| FABP1         | 97.006     | 205.074    | 155.417    | 3.630      | 81.572     | 21.112     | 184.823    | 261.379    | 219.793    |
| FABP2         | 317.365    | 1,675.063  | 1,112.816  |            | 604.668    |            | 1,530.726  | 1,770.572  | 1,448.155  |
| FABP6         | 3,104.188  | 2,628.456  | 4,576.408  | 1,530.726  | 4,039.609  | 1,438.152  | 1,332.574  |            | 1,858.599  |
| MUC2          | 44.632     | 37.531     | 24.251     | 37.531     | 31.779     | 39.671     | 29.041     | 16.679     | 32.447     |
| MUC13         | 191.341    | 113.772    | 103.968    | 124.500    | 140.070    | 127.116    | 85.627     | 107.635    | 101.125    |
| I-MUC         | 17.753     | 0.441      | 0.141      | 132.514    | 61.393     |            | 0.210      | 0.046      | 0.143      |
| HES1-B        | 4.563      | 2.621      | 4.959      | 8.938      | 4.408      | 6.320      | 1.741      | 3.630      | 4.287      |
| KLF4          | 3.227      | 3.010      | 3.095      | 2.346      | 2.732      | 2.158      | 3.317      | 2.346      | 3.891      |
| TNF- $\alpha$ | 0.116      | 0.129      | 0.120      | 0.180      | 0.106      | 0.204      | 0.137      | 0.153      | 0.129      |
| IL-1 $\beta$  | 0.088      | 0.080      | 0.082      | 0.200      | 0.099      | 0.139      | 0.116      | 0.136      | 0.148      |
| IL-6          | 0.031      | 0.012      | 0.026      | 0.020      | 0.014      | 0.035      | 0.015      | 0.017      | 0.038      |
| IL-8          | 0.219      | 0.128      | 0.346      | 0.179      | 0.195      | 0.297      | 0.102      | 0.138      | 0.297      |
| IL-10         | 0.218      | 0.138      | 0.173      | 0.131      | 0.127      | 0.252      | 0.125      | 0.125      | 0.170      |
| CD4-full      | 0.529      | 0.532      | 0.483      | 0.620      | 0.500      | 0.946      | 0.392      | 0.285      | 0.351      |
| CD8a          | 1.464      | 0.678      | 0.901      | 1.526      | 1.181      | 1.879      | 0.895      | 0.877      | 0.514      |
| CD8b          | 0.264      | 0.137      | 0.108      | 0.233      | 0.196      | 0.346      | 0.129      | 0.150      | 0.088      |
| LGALS1        | 9.918      | 9.849      | 11.632     | 9.254      | 11.551     | 15.242     | 6.727      | 8.000      | 11.713     |
| LGALS8        | 4.347      | 3.364      | 2.676      | 7.568      | 5.938      | 6.964      | 1.636      | 2.868      | 2.676      |
| IgM           | 12.641     | 9.646      | 4.595      | 5.464      | 3.138      | 29.243     | 1.580      | 2.378      | 4.084      |
| IgT           | 0.043      | 0.099      | 0.032      | 0.032      | 0.124      | 0.213      | 0.112      | 0.060      | 0.029      |
| IgT-m         | 0.261      | 0.712      | 1.283      | 0.973      | 0.865      | 1.537      | 0.753      | 0.441      | 0.620      |
| mIgM          | 0.423      | 0.216      | 0.213      | 0.334      | 0.275      |            | 0.120      | 0.102      | 0.152      |
| SIRT1         | 0.457      | 0.883      | 0.835      | 1.165      | 0.785      | 1.347      | 0.582      | 0.758      | 0.753      |
| SIRT2         | 0.547      | 1.357      | 1.000      | 1.444      | 1.301      | 1.329      | 0.688      | 1.035      | 0.807      |
| SIRT3         | 0.155      | 0.398      | 0.339      | 0.460      | 0.444      | 0.595      | 0.356      | 0.578      | 0.460      |
| SIRT4         | 0.067      | 0.123      | 0.079      | 0.218      | 0.106      | 0.174      | 0.099      | 0.119      | 0.082      |
| SIRT5         | 0.660      | 1.395      | 1.189      | 0.933      | 1.087      | 1.231      | 0.966      | 1.181      | 0.747      |
| SIRT6         | 0.156      | 0.224      | 0.195      | 0.189      | 0.204      | 0.332      | 0.138      | 0.180      | 0.117      |
| SIRT7         | 0.143      | 0.293      | 0.264      | 0.287      | 0.198      | 0.337      | 0.176      | 0.228      | 0.182      |

## Gene Expression - PI D3

|               | 22.1       | 35.1       | 36.1       | 22.2       | 35.2       | 36.2       | 22.13      | 22.13      | 36.3       |
|---------------|------------|------------|------------|------------|------------|------------|------------|------------|------------|
|               | Expression | Expression | Expression | Expression | Expression | Expression | Expression | Expression | Expression |
| OCLN          | 7.568      | 6.681      | 11.794     | 17.753     | 8.340      |            | 5.938      | 8.515      | 11.081     |
| CLDN12        | 0.895      | 0.877      | 1.310      | 1.972      | 1.347      |            | 0.908      | 0.946      | 1.007      |
| CLDN15        | 32.000     | 23.588     | 64.445     | 103.968    | 41.933     |            | 28.641     | 49.522     | 45.570     |
| CDH1          | 12.641     | 9.190      | 15.032     |            | 14.929     |            | 9.254      | 12.996     | 13.548     |
| CDH17         | 45.887     | 60.548     | 54.192     | 30.274     | 44.324     |            | 49.522     | 46.527     | 68.594     |
| ALPI          | 30.274     | 29.446     | 45.887     | 25.107     | 23.264     |            | 26.355     | 31.341     | 48.503     |
| FABP1         | 173.645    | 159.786    | 103.968    |            | 46.851     |            | 165.421    | 104.691    | 242.191    |
| FABP2         | 1,418.352  | 1,009.902  | 519.147    |            | 222.861    |            | 1,160.073  | 464.650    |            |
| FABP6         | 4,837.346  | 2,977.736  | 3,848.285  |            | 2,896.309  |            | 1,722.156  | 1,833.011  | 2,005.853  |
| MUC2          | 25.992     | 26.723     | 41.070     | 55.330     | 43.713     |            | 32.672     | 54.569     | 35.753     |
| MUC13         | 99.733     | 88.647     | 101.125    | 148.056    | 83.286     |            | 76.639     | 85.036     | 106.891    |
| I-MUC         | 0.248      | 0.078      | 14.520     | 151.167    | 33.359     |            | 0.219      | 32.672     | 0.189      |
| HES1-B        | 5.389      | 1.840      | 9.448      | 10.196     | 5.579      |            | 1.682      | 3.732      | 2.514      |
| KLF4          | 3.053      | 2.282      | 3.758      | 2.189      | 3.249      |            | 2.114      | 2.928      | 3.364      |
| TNF- $\alpha$ | 0.136      | 0.101      | 0.166      | 0.237      | 0.222      |            |            | 0.118      | 0.152      |
| IL-1 $\beta$  | 0.087      | 0.060      | 0.115      | 0.283      | 0.113      |            | 0.072      | 0.111      | 0.114      |
| IL-6          | 0.023      | 0.020      | 0.026      | 0.086      | 0.022      |            | 0.016      | 0.090      | 0.039      |
| IL-8          | 0.172      | 0.072      | 0.356      | 0.285      | 0.270      |            | 0.102      | 0.207      | 0.321      |
| IL-10         | 0.075      | 0.116      | 0.173      | 0.358      | 0.219      |            | 0.134      | 0.110      | 0.166      |
| CD4-full      | 0.374      | 0.570      | 0.441      |            | 0.693      |            | 0.344      | 0.374      | 0.358      |
| CD8a          | 0.853      | 0.547      | 1.275      | 2.144      | 1.741      |            | 0.697      | 0.993      | 0.940      |
| CD8b          | 0.112      | 0.060      | 0.253      | 0.406      | 0.227      |            | 0.102      | 0.157      | 0.132      |
| LGALS1        | 5.979      | 8.340      | 13.177     | 15.671     | 12.381     |            | 7.362      | 6.821      | 9.126      |
| LGALS8        | 2.028      | 1.670      | 4.056      | 8.225      | 5.389      |            | 1.905      | 4.691      | 3.364      |
| IgM           | 12.126     | 15.889     | 9.383      |            | 6.021      |            | 4.790      | 6.916      | 3.387      |
| IgT           | 0.079      | 0.049      | 0.131      |            | 0.356      |            | 0.040      | 0.051      | 0.117      |
| IgT-m         |            |            | 1.110      | 2.313      | 2.969      |            |            | 0.678      | 0.727      |
| mIgM          | 0.180      | 0.209      | 0.293      | 1.050      | 0.646      | 0.420      | 0.166      | 0.312      | 0.174      |
| SIRT1         | 0.637      | 0.514      | 0.933      | 1.133      | 0.841      | 1.945      | 0.547      | 0.651      | 0.818      |
| SIRT2         | 0.732      | 0.966      | 1.079      | 1.569      | 1.248      | 1.840      | 0.674      | 1.223      | 0.779      |
| SIRT3         | 0.275      | 0.454      | 0.441      | 0.801      | 0.521      | 0.986      | 0.283      | 0.435      | 0.463      |
| SIRT4         | 0.093      | 0.070      | 0.139      | 0.203      | 0.141      | 0.224      | 0.084      | 0.110      | 0.125      |
| SIRT5         | 1.057      | 1.141      | 1.404      | 1.404      | 1.079      | 1.803      | 0.940      | 1.087      | 1.214      |
| SIRT6         | 0.144      | 0.167      | 0.241      | 0.403      | 0.247      | 0.409      | 0.195      | 0.160      | 0.264      |
| SIRT7         | 0.154      | 0.182      | 0.287      | 0.351      | 0.255      | 0.603      | 0.124      | 0.144      | 0.225      |
